# Supplementary material for: Implications for annual retesting after a test-and-not-treat strategy for onchocerciasis elimination in areas co-endemic with Loa loa infection: an observational cohort study
Source: PubMed Central journal article supplement (PMC8150319; doi:10.1016/s1473-3099(19)30554-7), 2020-01
Supplement: mmc1.pdf [file mmc1.pdf]

# THE LANCET Infectious Diseases

## Supplementary webappendix

This webappendix formed part of the original submission and has been peer reviewed. We post it as supplied by the authors.

Supplement to: Pion SDS, Nana-Djeunga H, Niamsi-Emalio Y, et al. Implications for annual retesting after a test-and-not-treat strategy for onchocerciasis elimination in areas co-endemic with *Loa loa* infection: an observational cohort study. *Lancet Infect Dis* 2019; published online Oct 29.

| Pre-treatment <i>L. loa</i> microfilarial density (mf per mL) | TaNT                  |                                                                    |           |             | Gardon et al 1997     |                                                                    |           |             |
|---------------------------------------------------------------|-----------------------|--------------------------------------------------------------------|-----------|-------------|-----------------------|--------------------------------------------------------------------|-----------|-------------|
|                                                               | Number of individuals | Arithmetic mean of <i>L. loa</i> microfilarial density (mf per mL) |           | % Reduction | Number of individuals | Arithmetic mean of <i>L. loa</i> microfilarial density (mf per mL) |           | % Reduction |
|                                                               |                       | Baseline                                                           | 18 months |             |                       | Baseline                                                           | 12 months |             |
| 0                                                             | 5,649                 | 0                                                                  | 18·8      | -           | 39                    | 0                                                                  | 0·5       | -           |
| 1–100                                                         | 3                     | 39·0                                                               | 0         | 100·0       | 41                    | 37·6                                                               | 9·8       | 74·0        |
| 101–500                                                       | 274                   | 268·1                                                              | 255·3     | 30·2        | 40                    | 267·0                                                              | 152·5     | 42·9        |
| 501–2,000                                                     | 296                   | 1,150·0                                                            | 448·6     | 66·9        | 19                    | 1,029·5                                                            | 91·6      | 91·1        |
| 2,001–10,000                                                  | 445                   | 4,943·3                                                            | 1,295·8   | 75·4        | 45                    | 4,459·1                                                            | 916·0     | 79·5        |
| 10,001–20,000                                                 | 160                   | 13,946·9                                                           | 3,464·3   | 79·4        | 27                    | 14,277·8                                                           | 2,906·7   | 79·6        |

**Table 1. Arithmetic mean of *L. loa* microfilarial density before and after 18 months (present study) and 12 months (Gardon et al 1997) after a first single dose of ivermectin**
